# Supplementary material for: Gold nanotriangles: scale up and X-ray radiosensitization effects in mice
Source: Royal Society of Chemistry journal article supplement (doi:10.1039/c6nr08172j), 2017-01-01
Supplement: c6nr08172j1.pdf [file c6nr08172j1.pdf]

## Supporting Information

### Gold Nanotriangles: Scale Up and X-Ray Radiosensitization Effects in Mice

**Shanta R. Bhattarai<sup>1,2§</sup>, Paul J. Derry<sup>3§</sup>, Kathryn Aziz<sup>1</sup>, Pankaj K. Singh<sup>1</sup>, Allison M. Khoo<sup>1</sup>, Awalpreet S. Chadha<sup>1</sup>, Anton Liopo<sup>3</sup>, Eugene R. Zubarev<sup>3</sup>, Sunil Krishnan<sup>4\*</sup>**

In vivo biochemical and hematological abbreviations and units.

Albumin (ALB, g dL<sup>-1</sup>), alkaline phosphatase (ALP, U L<sup>-1</sup>), alanine aminotransferase (ALT, U L<sup>-1</sup>), aspartate aminotransferase (AST, U L<sup>-1</sup>), basophils (Basos, 10<sup>3</sup> μL<sup>-1</sup>), blood urea nitrogen (BUN, mg dL<sup>-1</sup>), calcium (CA, mg dL<sup>-1</sup>), cetyltrimethylammonium bromide (CTAB), cetyltrimethylammonium chloride (CTAC), chloride (Cl, mEq L<sup>-1</sup>), creatinine (Cr, mg dL<sup>-1</sup>), eosinophils (Eos, 10<sup>3</sup> μL<sup>-1</sup>), enhanced permeability and retention effect (EPR), gold nanotriangle (AuNT), globulin (GLOB, g dL<sup>-1</sup>), hematocrit (HCt, %), hemoglobin (HGb, g dL<sup>-1</sup>), inductively-coupled plasma mass spectrometry (ICP-MS), potassium (K, mEq L<sup>-1</sup>), lactate dehydrogenase (LDH, U L<sup>-1</sup>), large unstained cells (LUC, 10<sup>3</sup> μL<sup>-1</sup>), laser scanning confocal microscopy (LSCM), lymphocytes (Lymphs, 10<sup>3</sup> μL<sup>-1</sup>), mean corpuscular hemoglobin (MCH, pg), mean corpuscular hemoglobin concentration (MCHC, g dL<sup>-1</sup>), mean corpuscular volume (MCV, fL), monocytes (Monos, 10<sup>3</sup> μL<sup>-1</sup>), methoxypoly(ethylene glycol) thiol (mPEG-SH), mean platelet volume (MPV, fL), sodium (Na, mEq L<sup>-1</sup>), PEGylated gold nanotriangle (pAuNT), phosphorous (PHOS, mg dL<sup>-1</sup>), poly(ethylene glycol) (PEG), platelet count (PLT, 10<sup>3</sup> μL<sup>-1</sup>), red cell distribution width (RCW, %), red blood cell (RBC, 10<sup>6</sup> μL<sup>-1</sup>), random blood sugar (RBS, glucose, mg dL<sup>-1</sup>), segmented neutrophils (Segs, 10<sup>3</sup> μL<sup>-1</sup>), total bilirubin (TBIL, mg dL<sup>-1</sup>), total protein (TP, g dL<sup>-1</sup>), white blood cell (WBC, 10<sup>3</sup> μL<sup>-1</sup>).

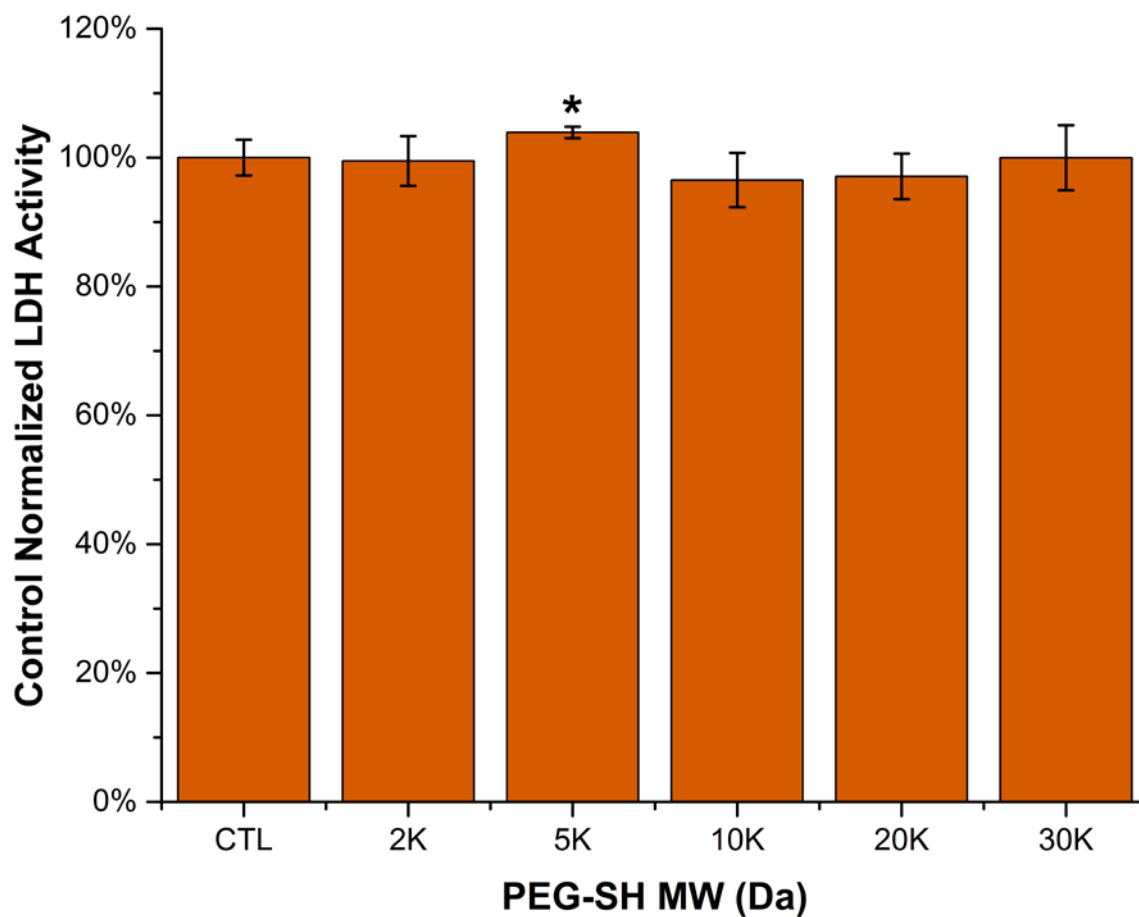

**Figure S1.** LDH Activity of MCF-7 cells exposed to 13.8 ppm AuNTs with different molecular weights of PEG-SH. Significance level of  $p < 0.05$  (denoted with asterisk.)

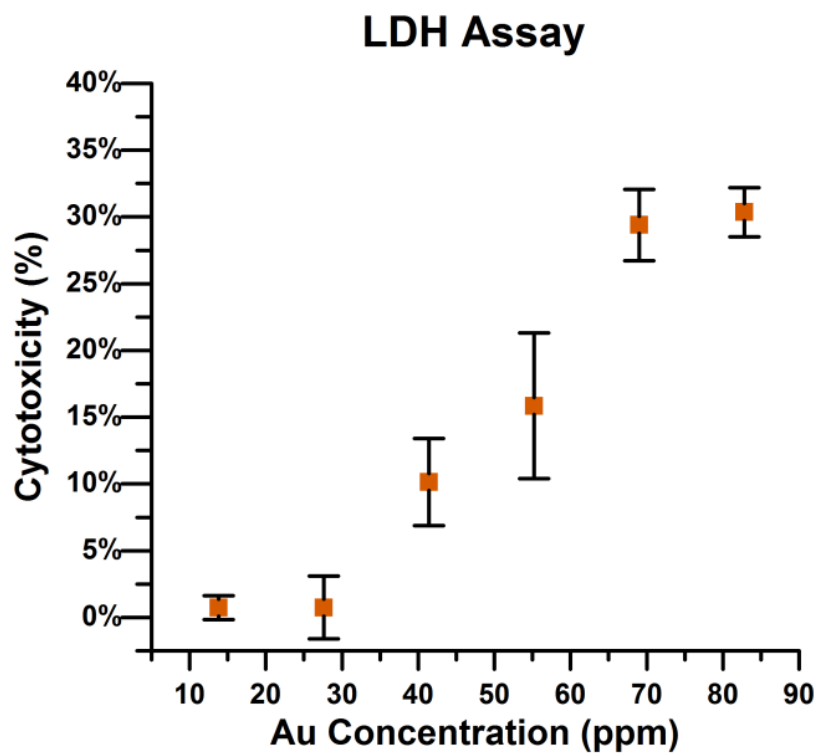

**Figure S2.** Concentration dependent cytotoxicity of 5K-MW PEG-SH AuNTs. Percent Cytotoxicity of 5K-MW mPEGylated AuNTs at increasing concentrations of AuNTs. A direct correlation between cytotoxicity and proliferation and nanotriangle concentration can be observed.

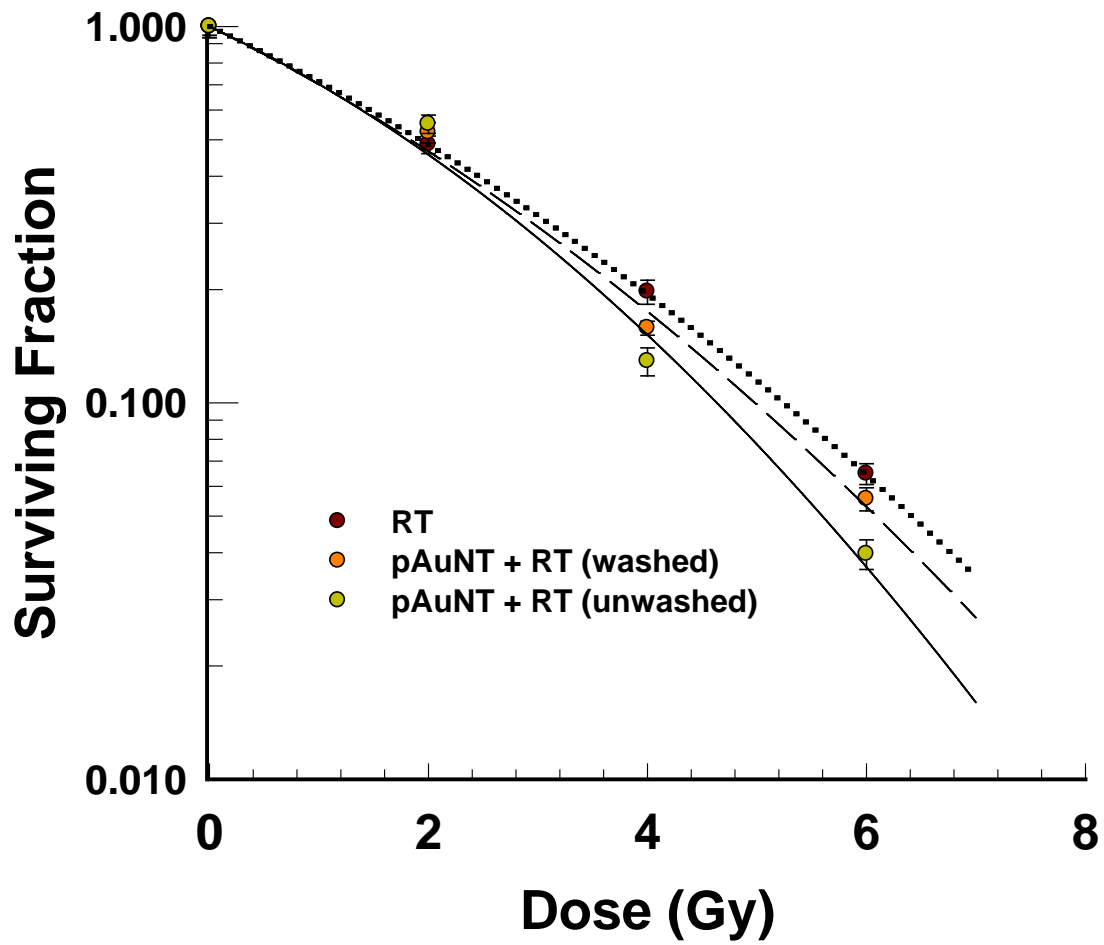

**Figure S3.** *In vitro* radiation enhancement effect of pAuNTs. The surviving fraction of U87MG cells is smaller when exposed to RT with the addition of pAuNTs, with a maximum reduction appearing between 3-4 Gy.

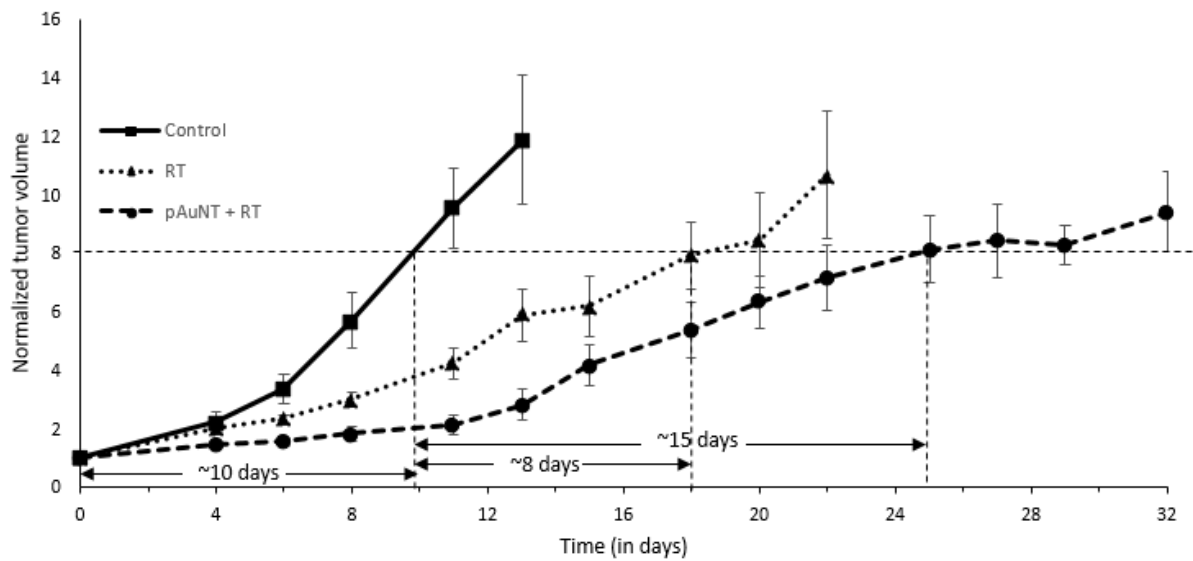

**Figure S4.** pAuNT *in vivo* tumor growth delay with prolonged follow-up. Normalized tumor volumes were compared throughout the time course of the experiment. The mice were sacrificed when their implanted tumors reached the IACUC-mandated maximum volume. Mice that received pAuNTs+RT lived longer with smaller tumors.

**Table S1.** Biochemical (A) and hematological (B) toxicity panel results shown with averages and  $1\sigma$ -deviations for mice receiving no treatment (control) and mice receiving a 2.7 mg/kg dose of AuNTs after 18 days. Abbreviations are detailed in the Supplemental Information.

| <b>Biochemical Panels</b>                  |               |               |
|--------------------------------------------|---------------|---------------|
| Analyte                                    | Control (n=2) | pAuNT (n=3)   |
| ALB (g dL <sup>-1</sup> )                  | 2.3 ± 0.01    | 2.3 ± 0.06    |
| ALP (U L <sup>-1</sup> )                   | 17.5 ± 3.5    | 15.0 ± 1.00   |
| ALT (U L <sup>-1</sup> )                   | 28.0 ± 11.30  | 11.3 ± 7.5    |
| AST (U L <sup>-1</sup> )                   | 104 ± 6.4     | 167 ± 56.1    |
| BUN (mg dL <sup>-1</sup> )                 | 36.7 ± 8.70   | 25.9 ± 2.4    |
| CA (mg dL <sup>-1</sup> )                  | 11.4 ± 0.07   | 11.3 ± 0.1    |
| Cl (mEq L <sup>-1</sup> )                  | 114.2 ± 4.24  | 111.2 ± 0.4   |
| Cr (mg dL <sup>-1</sup> )                  | 0.2 ± 0       | 0.2 ± 0.01    |
| GLOB (10 <sup>3</sup> μL <sup>-1</sup> )   | 2.95 ± 0.077  | 2.8 ± 0.13    |
| K (g dL <sup>-1</sup> )                    | 7.5 ± 0.7     | 7.2 ± 0.13    |
| LDH (U L <sup>-1</sup> )                   | 590 ± 89.0    | 717 ± 76.0    |
| Na (mEq L <sup>-1</sup> )                  | 158.5 ± 3.39  | 155.5 ± 0.8   |
| PHOS (mg dL <sup>-1</sup> )                | 10.1 ± 0.14   | 10 ± 0.7      |
| RBS (glucose, mg dL <sup>-1</sup> )        | 81 ± 35.35    | 74 ± 16.5     |
| TBIL (mg dL <sup>-1</sup> )                | 0.2 ± 0       | 0.2 ± 0       |
| TP (g dL <sup>-1</sup> )                   | 5.3 ± 0.06    | 5.1 ± 0.1     |
| <b>Hematological Panels</b>                |               |               |
| Basos (10 <sup>3</sup> uL <sup>-1</sup> )  | 1.1 ± 0.90    | 0.955 ± 0.05  |
| Segs (10 <sup>3</sup> uL <sup>-1</sup> )   | 138 ± 68.0    | 167 ± 30.8    |
| Hct (%)                                    | 35 ± 0.7      | 33 ± 2.5      |
| HGb (g dL <sup>-1</sup> )                  | 10.3 ± 0.50   | 9.8 ± 0.70    |
| LUC (10 <sup>3</sup> uL <sup>-1</sup> )    | 3.24 ± 0.7    | 2.5 ± 0.24    |
| Lymphs (10 <sup>3</sup> uL <sup>-1</sup> ) | 7.4 ± 0.75    | 9.1 ± 3.44    |
| MCH (pg)                                   | 15.5 ± 0.40   | 15.25 ± 0.070 |
| MCHC (g dL <sup>-1</sup> )                 | 29.2 ± 0.70   | 29.9 ± 0.210  |
| MCV (fL)                                   | 53.2 ± 2.76   | 51.2 ± 0.070  |
| Monos (10 <sup>3</sup> uL <sup>-1</sup> )  | 1.04 ± 0.300  | 0.93 ± 0.092  |
| Eos (10 <sup>3</sup> uL <sup>-1</sup> )    | 0.63 ± 0.410  | 0.99 ± 0.050  |
| PLT (10 <sup>3</sup> uL <sup>-1</sup> )    | 1279 ± 212    | 1040 ± 182    |
| RBC (10 <sup>6</sup> uL <sup>-1</sup> )    | 6.6 ± 0.49    | 6.4 ± 0.48    |
| RDW (%)                                    | 17.55 ± 1.63  | 16.75 ± 0.071 |
| MPV (fL)                                   | 6.8 ± 0.14    | 6.75 ± 0.071  |
| WBC (10 <sup>3</sup> uL <sup>-1</sup> )    | 151 ± 69.6    | 181 ± 27.5    |
